# Supplementary material
Source: PubMed Central journal article supplement (PMC1356530)
Supplement: nar_34_2_709__1.pdf [file nar_34_2_709__1.pdf]

## *Legend*

*Figure1 ; Predicted structures of the RNAs used in the gel retardation experiments.* The RNA sequences were folded with *mfold* (<http://www.bioinfo.rpi.edu/applications/mfold>). The secondary structure of the 3' *rpsO*-A18 mRNA fragment was experimentally determined (1). Enzymatic probing of a slightly longer *hfq* mRNA fragment revealed that most of the secondary structures predicted by *mfold* are not stable in solution (2).

Table 1 : Primers used to perform mutagenesis

| Resulting plasmid | Template    | Primer sequence                                                                                                                   |
|-------------------|-------------|-----------------------------------------------------------------------------------------------------------------------------------|
| pTE607D40A        | pTE607      | For:GCTGCAAGGGCAAATCGAGTCTTTTGCTCA<br>GTTTCGTGATCCTGTTGAAAAACAC<br>Rev:GTGTTTTTCAACAGGATCACGAACTGAGCA<br>AAAGACTCGATTTGCCCTTGCAGC |
| pTE607F42A        | pTE607      | For:GGCAAATCGAGTCTTTTGATCAGGCTGTGAT<br>CCTGTTGAAAAACACGGTC<br>Rev:GACCGTGTTTTTCAACAGGATCACAGCCTG<br>ATCAAAAGACTCGATTTGCC          |
| pTE607K56A        | pTE607      | For:CACGGTCAGCCAGATGGTTTACGCTCACGC<br>GATTTCTACTGTTGTCCCGTC<br>Rev:GACGGGACAACAGTAGAAATCGCGTGAGC<br>GTAAACCATCTGGCTGACCGTG        |
| pTE607D40A-F42A   | pTE607-F42A | For:GGCAAATCGAGTCTTTTGCTCAGGCTGTGAT<br>CCTGTTGAAAAACACGGTC<br>Rev;GACCGTGTTTTTCAACAGGATCACAGCCTG<br>AGCAAAGACTCGATTTGCC           |
| pTE607V43C        | pTE607      | For:GGCAAATCGAGTCTTTTGATCAGTTCTGTAT<br>CCTGTTGAAAAACACGGT<br>Rev;GACCGTGTTTTTCAACAGGATACAGAACTG<br>ATCAAAAGACTCGATTTGCC           |
| pTE607V43R        | pTE607      | For:GGCAAATCGAGTCTTTTGATCAGTTCCGCAT<br>CCTGTTGAAAAACACGGTC<br>Rev;GACCGTGTTTTTCAACAGGATGCGGAACTG<br>ATCAAAAGACTCGATTTGCC          |
| pTX381V43C        | pTX381      | For:GGCAAATCGAGTCTTTTGATCAGTTCTGTAT<br>CCTGTTGAAAAACACGGT<br>Rev;GACCGTGTTTTTCAACAGGATACAGAACTG<br>ATCAAAAGACTCGATTTGCC           |
| pTX381V43R        | pTX381      | For:GGCAAATCGAGTCTTTTGATCAGTTCCGCAT<br>CCTGTTGAAAAACACGGTC<br>Rev;GACCGTGTTTTTCAACAGGATGCGGAACTG<br>ATCAAAAGACTCGATTTGCC          |

Table 2 ; *E. coli* strains used in this work.

| Strain                         | Relevant Genotype                                                                 | Source or Reference |
|--------------------------------|-----------------------------------------------------------------------------------|---------------------|
| TX2808                         | JC7623 <i>hfq1</i> :: $\Omega$ (kan <sup>R</sup> )                                | (3)                 |
| HAT10                          | <i>hfq10</i> ::cat (cm <sup>R</sup> )                                             | (4)                 |
| RO91                           | <i>rpoS742</i> :: <i>lacZ</i>                                                     | (5)                 |
| MCM11                          | RO91 <i>hfq10</i> ::cat (cm <sup>R</sup> )                                        | M. Springer         |
| BL21 $\lambda$ DE3 <i>hfq1</i> | BL21 $\lambda$ DE3 <i>hfq1</i> :: $\Omega$ □□□□                                   | This study          |
| N3433                          | <i>HfrH lacZ43 relA1 spoT1 thi-1</i>                                              | D. Apirion          |
| CAG12073                       | <i>cycA30</i> :: <i>Tn10</i> (tet <sup>R</sup> )                                  | (6)                 |
| MA261 <i>oppA</i> ::Km         |                                                                                   | (7)                 |
| IBPC937                        | TX2808 <i>hfqV43R</i> (kan <sup>S</sup> )                                         | This study          |
| IBPC946                        | TX2808 <i>hfq</i> $\Delta$ 22-294 (kan <sup>S</sup> )                             | This study          |
| IBPC929                        | N3433 <i>hfq1</i> :: $\Omega$ (kan <sup>R</sup> , <i>BclI</i> )                   | This study          |
| IBPC941                        | N3433 <i>hfqV43R cycA30</i> :: <i>Tn10</i> (tet <sup>R</sup> )                    | This study          |
| IBPC953                        | N3433 <i>hfq</i> $\Delta$ 22-294 <i>cycA30</i> :: <i>Tn10</i> (tet <sup>R</sup> ) | This study          |
| IBPC959                        | IBPC953 <i>oppA</i> ::km (kan <sup>R</sup> )                                      | This study          |
| ENSO                           | former name HfrG6 $\Delta$ 12                                                     | (8)                 |
| IBhfq95                        | ENSO <i>hfq</i> :: <i>lacZ</i>                                                    | This study          |
| IBhfq95- <i>hfqV43R</i>        | ENSO <i>hfq</i> :: <i>lacZ hfqV43R</i>                                            | This study          |

Table 3; Statistics of 1HK9 (wt, V43C, V43R)

| Simulation        | $\alpha$ -helix $\pm \sigma_{\alpha}\%$ | $\beta$ -strand $\pm \sigma_{\beta}\%$ | H    | B1   | B2   | B3   | B4   | B5   |
|-------------------|-----------------------------------------|----------------------------------------|------|------|------|------|------|------|
| Initial structure | 16.2                                    | 46.4                                   | 100  | 100  | 100  | 100  | 100  | 100  |
| wt                | 16.2 $\pm$ 0.4                          | 45.5 $\pm$ 1.4                         | 92.1 | 95.9 | 89.4 | 92.8 | 89.8 | 93.1 |
| V43C              | 15.8 $\pm$ 0.3                          | 46.3 $\pm$ 1.2                         | 90.2 | 96.2 | 91.2 | 95.7 | 90.9 | 94.3 |
| V43R              | 15.1 $\pm$ 0.4                          | 41.7 $\pm$ 1.6                         | 90.5 | 96.0 | 84.4 | 85.9 | 74.6 | 92.1 |

The mean and standard deviation ( $\sigma$ ) of  $\alpha$ -helix and  $\beta$ -strand are given for the minimized (initial) structure and for the time-averaged wt, V43C and V43R structures. The mean percentage of helix (H) and  $\beta$ -strands (B1 to B5) are shown to the right.

### References

1. Folichon, M., Arluison, V., Pellegrini, O., Huntzinger, E., Regnier, P. and Hajsndorf, E. (2003) The poly(A) binding protein Hfq protects RNA from RNase E and exoribonucleolytic degradation. *Nucleic Acids Res*, **31**, 7302-7310.
2. Vecerek, B., Moll, I. and Blasi, U. (2005) Translational autocontrol of the *Escherichia coli* hfq RNA chaperone gene. *Rna*, **11**, 976-984.
3. Tsui, H.-C., T., Leung, H.-C., E. and Winkler, M.E. (1994) Characterization of broadly pleiotropic phenotypes caused by an hfq insertion mutation in *Escherichia coli* K-12. *Mol. Microbiol.*, **13**, 35-49.
4. Wachi, M., Takada, A. and Nagai, K. (1999) Overproduction of the outer-membrane proteins FepA and FhuE responsible for iron transport in *Escherichia coli* hfq::cat mutant. *Biochem. Biophys. Res. Com.*, **264**, 525-529.
5. Lange, R. and Hengge-Aronis, R. (1994) The cellular concentration of the  $\sigma^S$  subunit of RNA polymerase in *Escherichia coli* is controlled at the levels of transcription, translation and protein stability. *Genes & Dev.*, **8**, 1600-1612.
6. Singer, M., Baker, T.A., Schnitzler, G., Deischel, S.M., Goel, M., Dove, W., Jaacks, K.J., Grossman, A.D., Erickson, J.W. and Gross, C.A. (1989) A collection of strains containing genetically linked alternating antibiotic resistance elements for genetic mapping of *Escherichia coli*. *Microbiol Rev*, **53**, 1-24.
7. Igarashi, K., Saisho, T., Yuguchi, M. and Kashiwagi, K. (1997) Molecular mechanism of polyamine stimulation of the synthesis of oligopeptide-binding protein. *J Biol Chem*, **272**, 4058-4064.
8. Dreyfus, M. (1988) What constitutes the signal for the initiation of protein synthesis on *Escherichia coli* mRNAs? *J Mol Biol*, **204**, 79-94.
